# Supplementary material
Source: HighWire-hosted journal article supplement (https://fmch.bmj.com/content/11/2/e002239)

**Appendix Figure 1** Flowchart for participant selection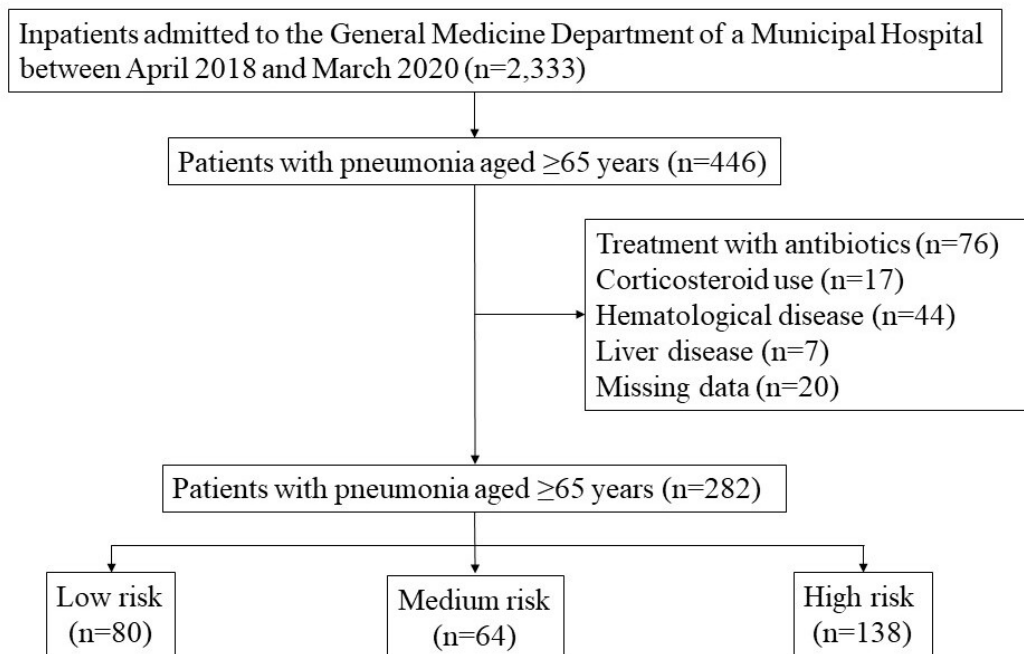

Supplement: inline-supplementary-material-1 [file inline-supplementary-material-1.pdf]
